# Supplementary material for: Companion Animals Are Spillover Hosts of the Multidrug-Resistant Human Extraintestinal Escherichia coli Pandemic Clones ST131 and ST1193
Source: Front Microbiol. 2020 Sep 2;11:1968. doi: 10.3389/fmicb.2020.01968 (PMC7492567; doi:10.3389/fmicb.2020.01968)
Supplement: Supplementary file 2 [file Data_Sheet_2.xlsx]

## Sheet: Sheet1
Table S6: Virulence gene prevalence by phylogenetic group and sequence type among 59 FQR and five FQS Australian cat and dog-source clinical Escherichia coli isolates
									Antimicrobial Resistance Genes
Ref Lab ID	Species	State	Phylogroup	ST	FQ Status	MDR	ExPEC	UPEC	Aminoglycoside Resistance															β-lactamases																			FQ		MLS		Phenicol
									aac6-Ib	aac(3)-IIa	aac(6')-Ib-cr	aac(3)-IId	aadA1	aadA2	aadA5	aph(3')-Ia	aph(3')-Ic	Aph3-Ia	aph(3'')-Ib	aph(6)-Id	Sat-2A	strA	strB	ampC1	ampC2	ampH	blaCMY-2	blaCMY-17	blaCMY-22	blaCTX-M-15	blaCTX-M-14	blaCTX-M-27	blaCTX-M-71	blaCTX-M-103	blaTEM-1B	blaTEM-70	blaTEM-104	blaTEM-105	blaTEM-122	blaTEM-141	blaOXA-1	blaPBP	qnrB4	qnrS1	mdf(A)	mph(A)	catA1	catA2	catB3
Q13/1/288	canine	WA	A	10	FQR
W13/1/6	canine	WA	A	10	FQR
W13/1/10	canine	WA	A	617	FQR
W13/1/8	canine	WA	A	617	FQR
Q13/2/52-2	feline	QLD	A	744	FQR
N13/1/733	canine	NSW	A	744	FQR
N13/1/274	canine	NSW	A	744	FQR
V13/5/59	canine	VIC	A	744	FQR
S13/1/48	canine	SA	A	744	FQR
S13/1/61	canine	SA	A	744	FQR
S13/1/84	canine	SA	A	744	FQR
S13/1/85	canine	SA	A	744	FQR
Q13/2/49	canine	QLD	A	3944	FQR
Q13/2/87	canine	QLD	A	3944	FQR
N13/1/707	feline	NSW	B1	162	FQR
Q13/2/28	feline	QLD	B1	224	FQR
Q13/2/85	feline	QLD	B1	224	FQR
Q13/2/9	canine	QLD	B1	224	FQR
Q13/2/29	canine	QLD	B1	224	FQR
Q13/1/89	canine	QLD	B1	224	FQR
N13/1/378	canine	QLD	B1	224	FQR
N13/1/795	canine	NSW	B1	224	FQR
N13/4/97	canine	NSW	B1	224	FQR
V13/4/28	canine	VIC	B1	224	FQR
S13/1/69	canine	SA	B1	224	FQR
V13/2/170	canine	VIC	B1	1642	FQR
Q13/1/229	feline	NSW	B1	2179	FQR
Q13/1/272	canine	NSW	B1	2179	FQR
N13/1/6	canine	NSW	B1	2179	FQR
N13/1/34	canine	NSW	B1	2179	FQR
N13/1/133	canine	NSW	B1	2179	FQR
N13/1/709	canine	NSW	B1	2179	FQR
N13/1/109	canine	QLD	B2	131	FQS
N13/1/75	canine	NSW	B2	131	FQS
Q13/1/261	canine	NSW	B2	131	FQS
S13/1/53	canine	SA	B2	131	FQS
Q13/1/80	canine	SA	B2	131	FQS
N13/1/272	feline	NSW	B2	131	FQR
N13/4/125	feline	NSW	B2	131	FQR
N13/1/351	canine	NSW	B2	131	FQR
N13/4/38	canine	NSW	B2	131	FQR
N13/4/101	canine	NSW	B2	131	FQR
W13/1/13	canine	WA	B2	131	FQR
S13/1/48-2	canine	SA	B2	6998	FQR
Q13/1/281	canine	NSW	C	410	FQR
V13/2/449	canine	VIC	C	8242	FQR
Q13/2/40	feline	QLD	D	38	FQR
Q13/2/52	feline	QLD	D	38	FQR
N13/1/284	feline	QLD	D	38	FQR
N13/4/131	canine	NSW	D	38	FQR
Q13/1/297	canine	VIC	D	38	FQR
V13/6/2	canine	VIC	D	38	FQR
V13/5/4	canine	VIC	D	38	FQR
W13/1/2	canine	WA	D	38	FQR
W13/1/7	canine	WA	D	349	FQR
N13/4/17	canine	NSW	D	405	FQR
N13/4/72	canine	NSW	D	405	FQR
N13/1/97	canine	NSW	D	1177	FQR
Blue squares indicate gene presence
[truncated: 73 more columns]
